# Supplementary material for: A novel strategy via electrode catalysis induced nano transformation for lithiated-bimetallic-oxides to avoid the long activation process of advanced lithium-ion batteries
Source: Royal Society of Chemistry journal article supplement (doi:10.1039/d2nr05021h), 2022-01-01
Supplement: d2nr05021h1.pdf [file d2nr05021h1.pdf]

# **A Novel Strategy Via Electrode Catalysis Induced Nano Transformation for Lithiated-Bimetallic- Oxides to Avoid Long Activation Process of Advanced Lithium-Ion Batteries**

Qiuchen Lu<sup>a</sup>, Youzhong Dong<sup>a\*</sup>, Qinghua Fan<sup>a</sup>, Quan Kuang<sup>a</sup>, Yanming  
Zhao<sup>a,c\*</sup>

<sup>a</sup>School of Physics and Optoelectronics, South China University of Technology,  
Guangzhou, 510640, P. R. China

<sup>c</sup>South China Institute of Collaborative Innovation, Dongguan, 523808, P. R.  
China

**\*Corresponding author.** E-mail address: [yzdong@scut.edu.cn](mailto:yzdong@scut.edu.cn) (Youzhong  
Dong), [zhaoyym@scut.edu.cn](mailto:zhaoyym@scut.edu.cn) (Yanming Zhao)

**Table S1.** The relevant fitting results of the Nyquist plots of the LVME and STLVME before cycle, after 50 cycles at a current density of 100 mA g<sup>-1</sup>.

| <b>Cells</b>           | <b>R<sub>ct</sub> (Ω)</b> | <b>R<sub>s</sub> (Ω)</b> | <b>R<sub>ct</sub> (Ω)</b> | <b>σ<sub>W</sub> (Hz<sup>1/2</sup>·Ω)</b> |
|------------------------|---------------------------|--------------------------|---------------------------|-------------------------------------------|
| <b>LVME</b>            |                           |                          |                           |                                           |
| <b>Before cycle</b>    | -                         | 2.74                     | 501.4                     | 278.4                                     |
| <b>After 50 cycles</b> | 13.79                     | 1.40                     | 12.05                     | 54.3                                      |
| <b>STLVME</b>          |                           |                          |                           |                                           |
| <b>Before cycle</b>    | -                         | 1.81                     | 222.4                     | 83.1                                      |
| <b>After 50 cycles</b> | 29.30                     | 5.15                     | 39.73                     | 36.7                                      |

## Multi-step Sintering Method

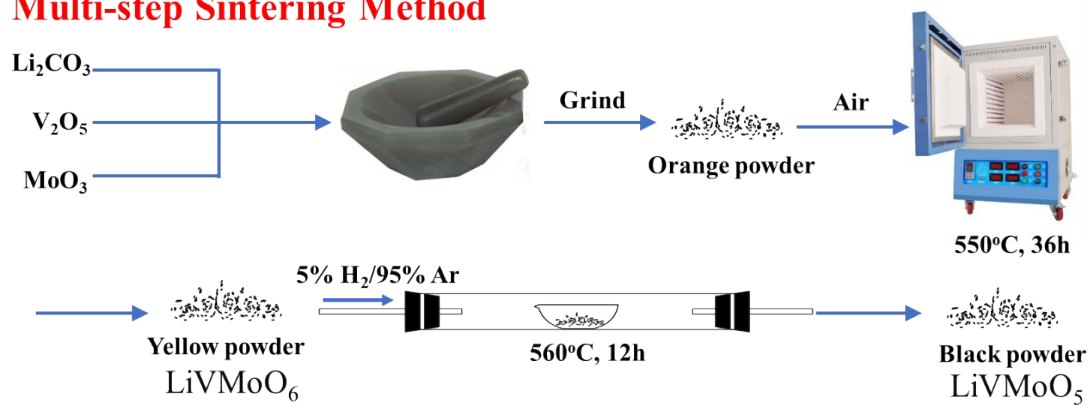

(a)

## One-step sintering Method

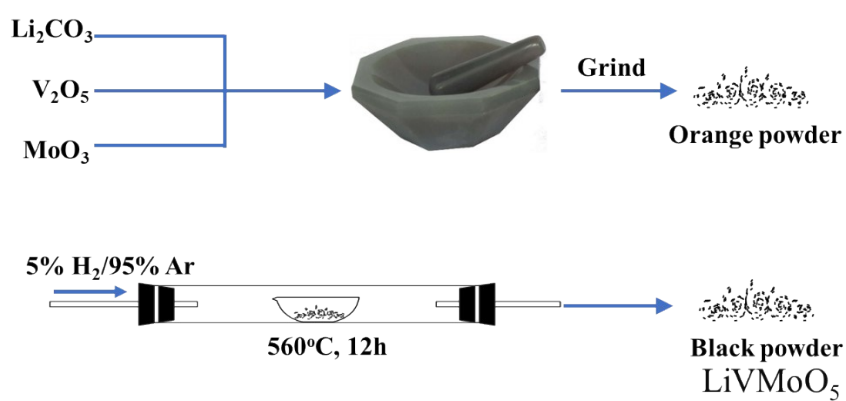

(b)

**Fig. S1.** (a) Simple scheme of  $\text{LiVMoO}_5$  power prepared by multi-step sintering method; (b)

Simple scheme of  $\text{LiVMoO}_5$  power prepared by one-step sintering method.

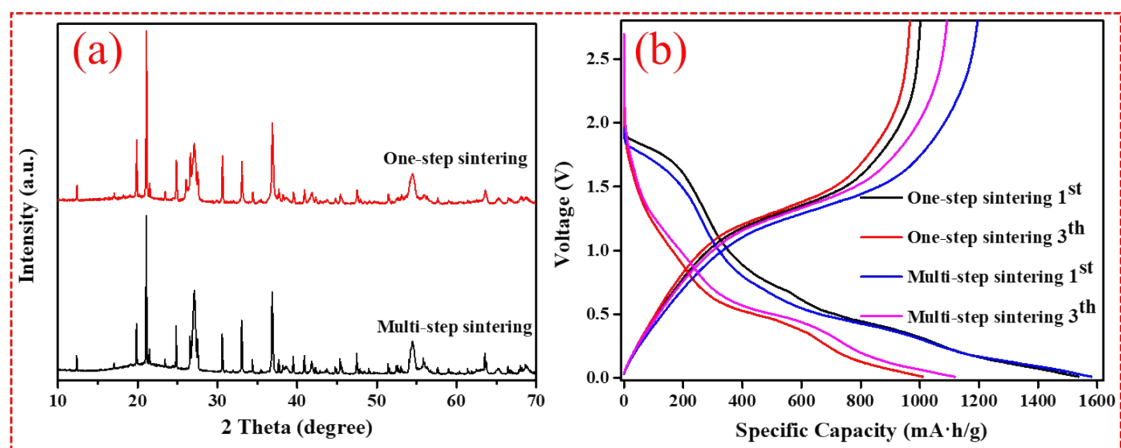

**Fig. S2.** (a) X-ray diffraction pattern of  $\text{LiVMoO}_5$  sample prepared by multi-step sintering method and one-step sintering method; (b) The charge/discharge profiles of the initial 1<sup>st</sup>, 3<sup>rd</sup> cycles at a current density of  $100 \text{ mA g}^{-1}$  for the STL VME prepared by multi-step sintering method and one-step sintering method.

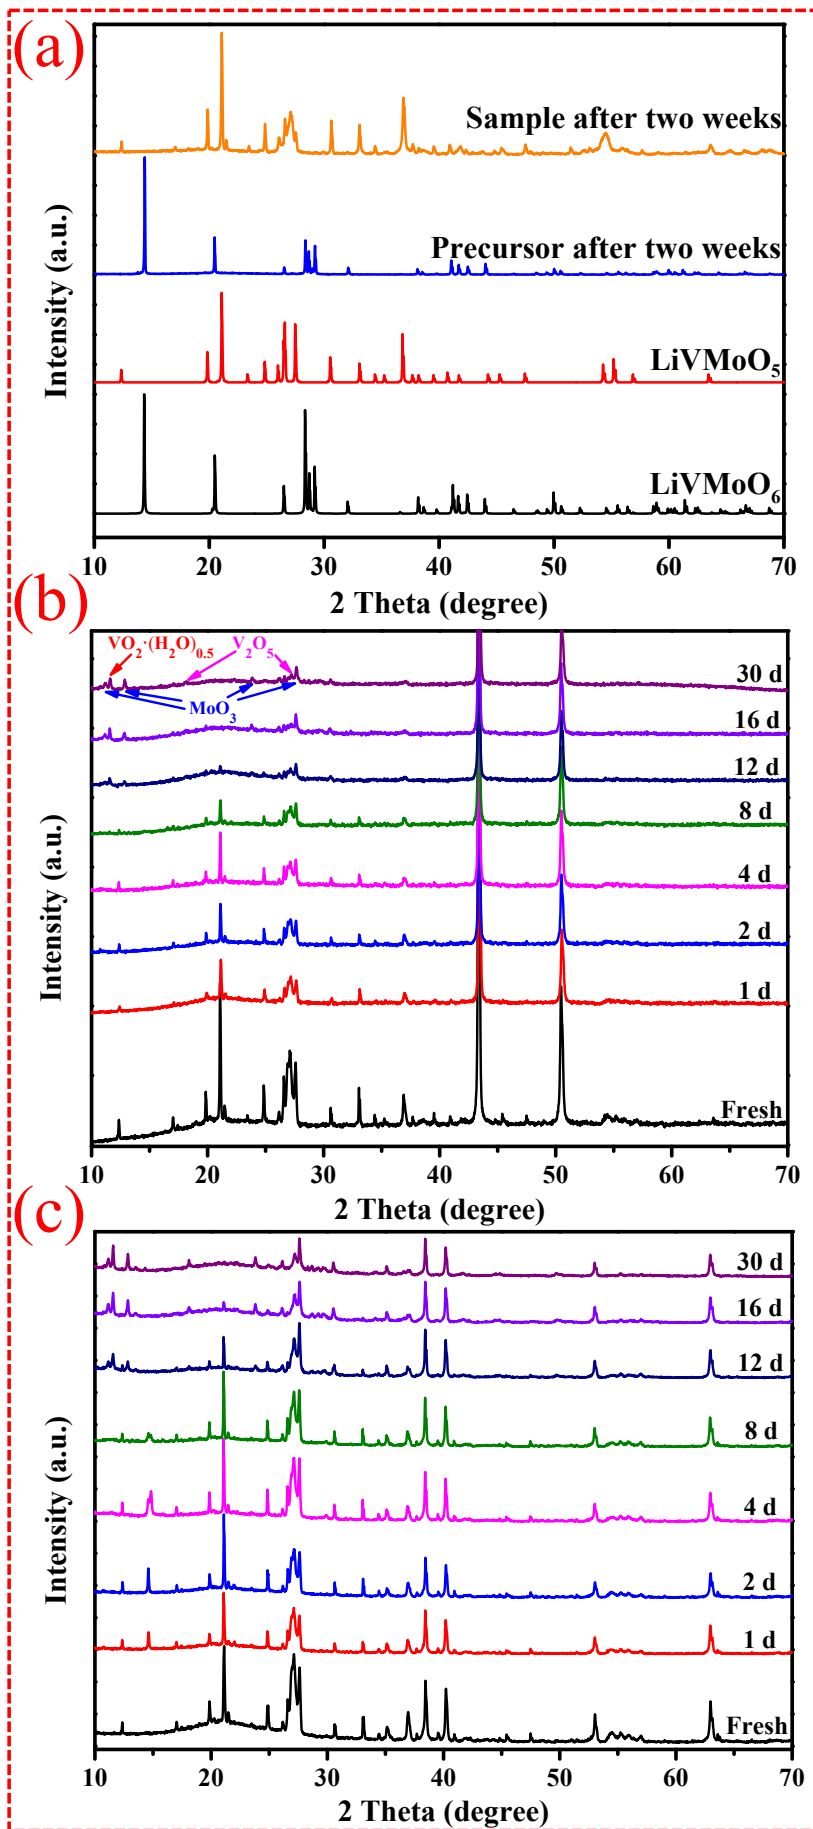

**Fig. S3.** (a) The X-ray diffraction pattern of the  $\text{LiVMoO}_5$  power after two weeks in air and the precursor power after two weeks in air; (b) The *ex-situ* XRD pattern evolution of the  $\text{LiVMoO}_5$  electrode (Cu Collector) for one month in the air; (c) The *ex-situ* XRD pattern evolution of the  $\text{LiVMoO}_5$  electrode (Ti Collector) for one month in air.

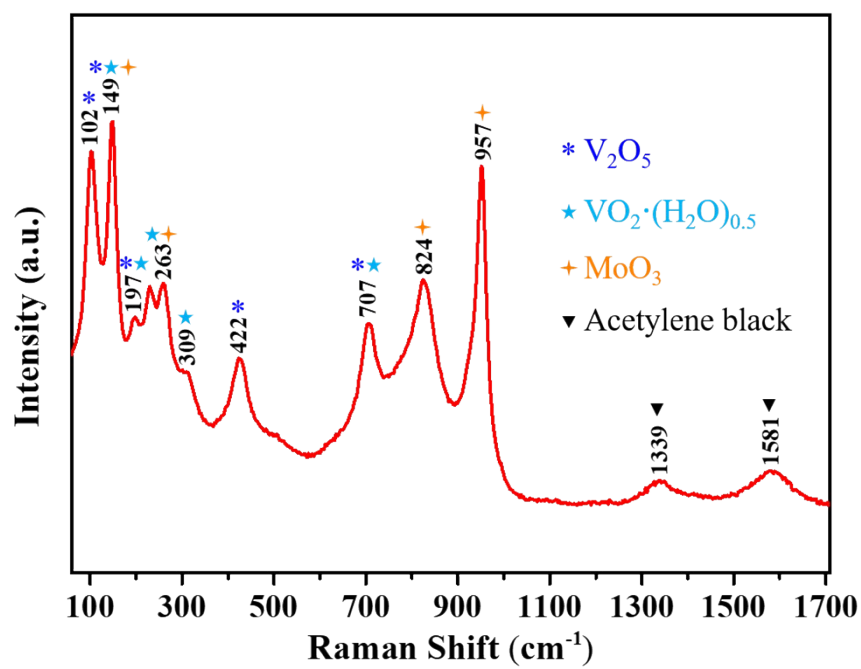

**Fig. S4.** The Raman spectrum of the STL VME.

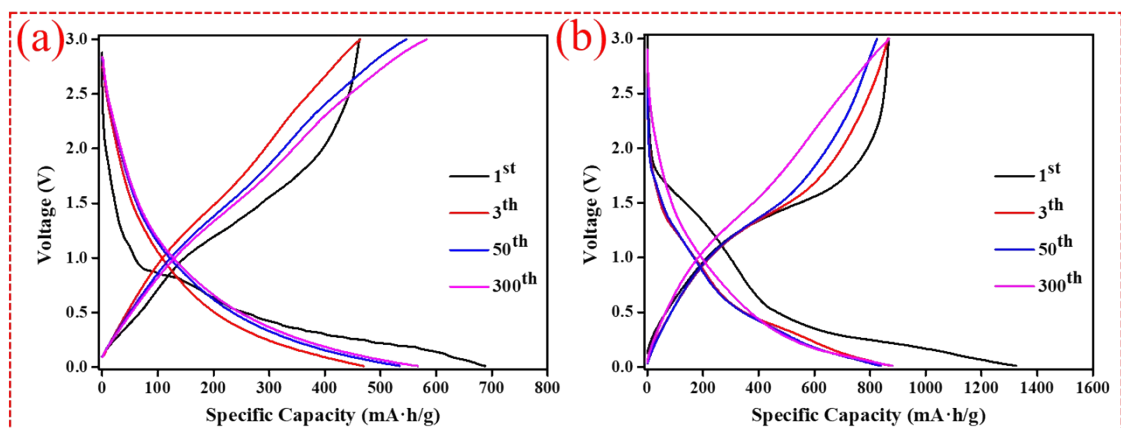

**Fig. S5.** (a, b) The charge/discharge profiles of LVME and STLVME for different cycles at a current density of  $0.5 \text{ A g}^{-1}$ .



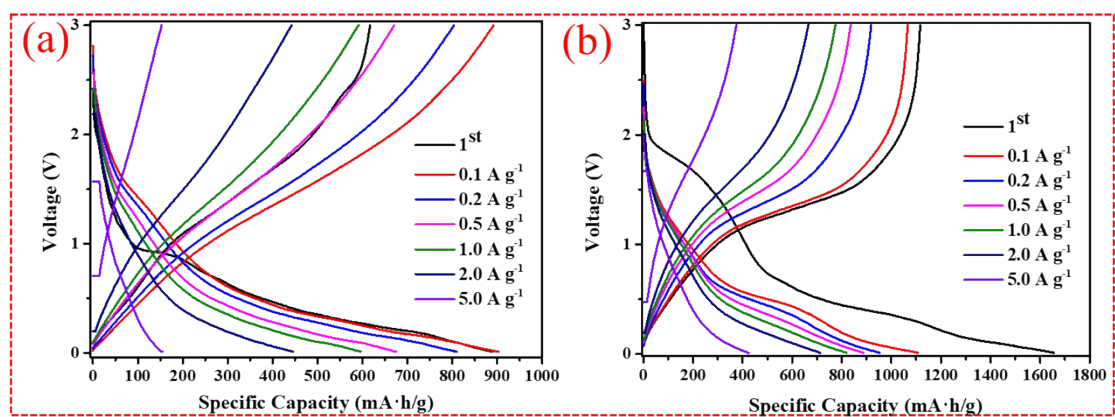

**Fig. S6.** (a, b) The charge/discharge profiles of LVME (after 50 cycles at a current density of 100 mA g<sup>-1</sup>) and STLVME at various current rates (0.1, 0.2, 0.5, 1.0, 2.0 and 5.0 A g<sup>-1</sup>).

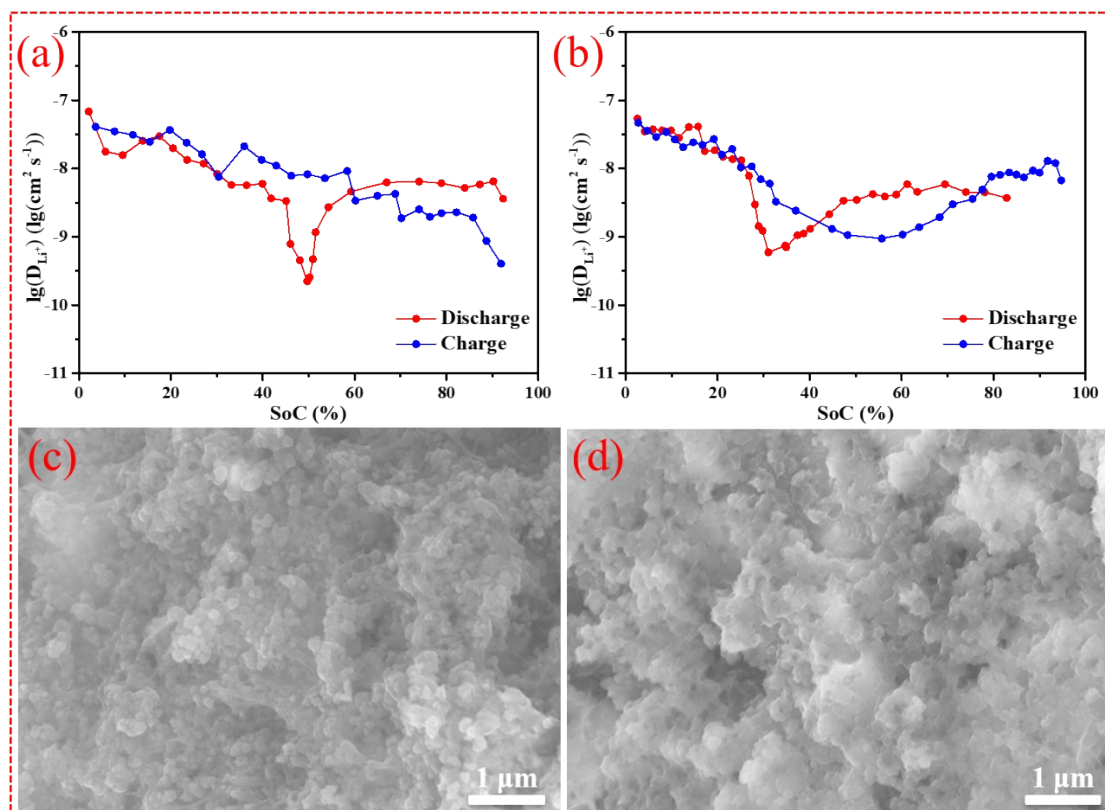

**Fig. S7.** (a, b) The  $\lg(D_{Li^+})$  ( $\lg(Li^+$  diffusion coefficient)) versus the state of charge (SoC) of the LVME and STLVME during charge/discharge process in LIBs; SEM images of (c) STLVME (LVME specially treated after two weeks), (d) LVME after 50 cycles at a current density of 100  $\text{mA g}^{-1}$ .

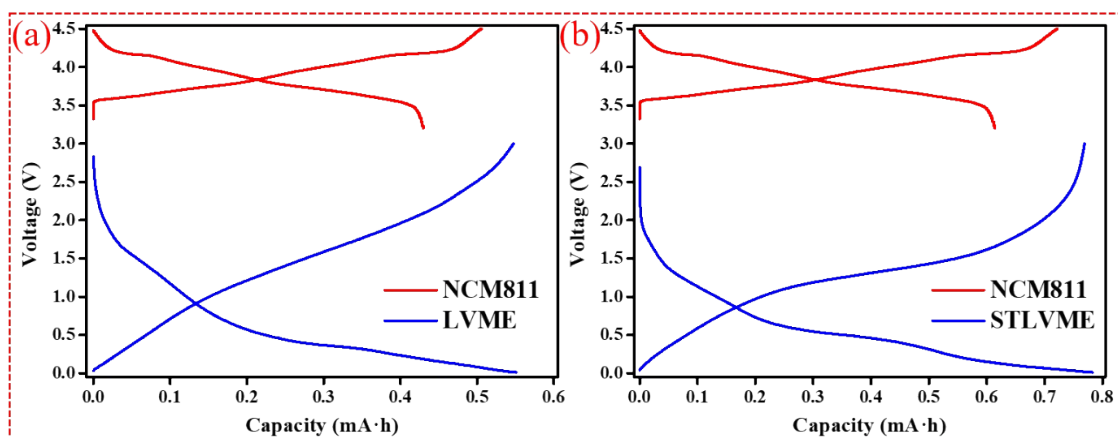

**Fig. S8.** The 3rd charge/discharge curves of NCM811 and (a) LVME; (b) STLVME in the Li-ion half-cells at 0.1 C rate (1 C = 200 mA g<sup>-1</sup>) (ratio of capacity is maintained as anode: cathode = 1.1:1).
